# Supplementary material for: Efficient and stable perovskite solar cells via surface defect passivation using 4-fluorobenzamine trifluoroacetate
Source: Royal Society of Chemistry journal article supplement (doi:10.1039/d4se00473f), 2024-01-01
Supplement: d4se00473f1.pdf [file d4se00473f1.pdf]

Supplementary Information for  
**Efficient and stable perovskite solar cells via surface defect passivation  
using 4-fluorobenzamine trifluoroacetate**

Zhongliang Chen<sup>#a</sup>, Chao Sun<sup>#a</sup>, Hong Wei Qiao<sup>\*a</sup>, Jiyuan Chen<sup>a</sup>, Xuelu Wang<sup>a</sup>, Yefeng Yao<sup>\*a</sup>

\* Corresponding authors

# These authors contributed equally

<sup>a</sup> Physics Department & Shanghai Key Laboratory of Magnetic Resonance, School of Physics and Electronic Science, East China Normal University, Shanghai 200241, P. R. China.

**E-mail: hwqiao@phy.ecnu.edu.cn, yfyao@phy.ecnu.edu.cn**

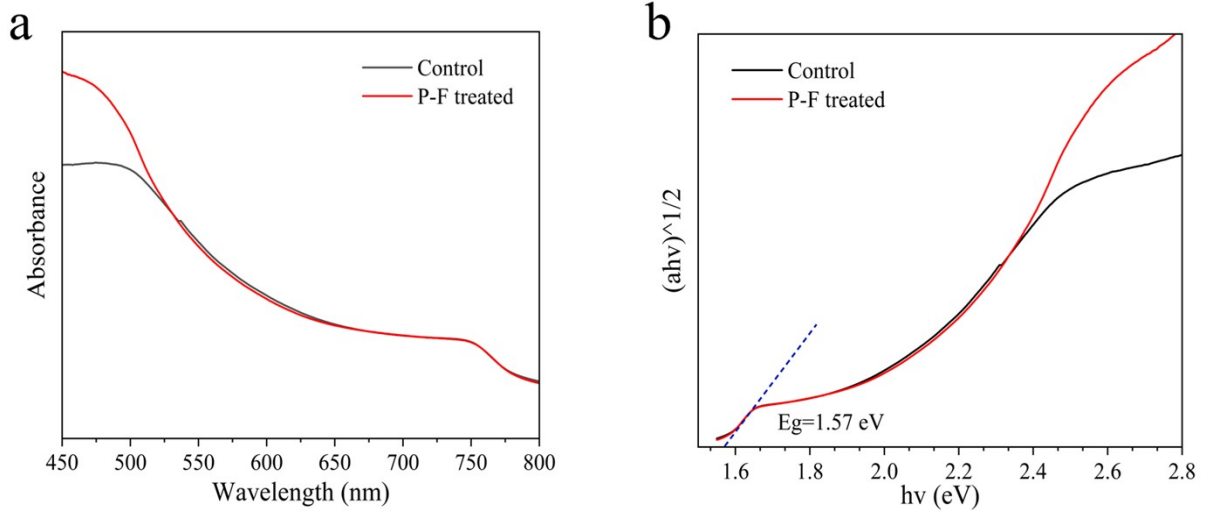

**Fig. S1.** (a) UV-vis absorption spectra of MAPbI<sub>3</sub> films without and with P-F treatment. (b) The corresponding Tauc spectra.

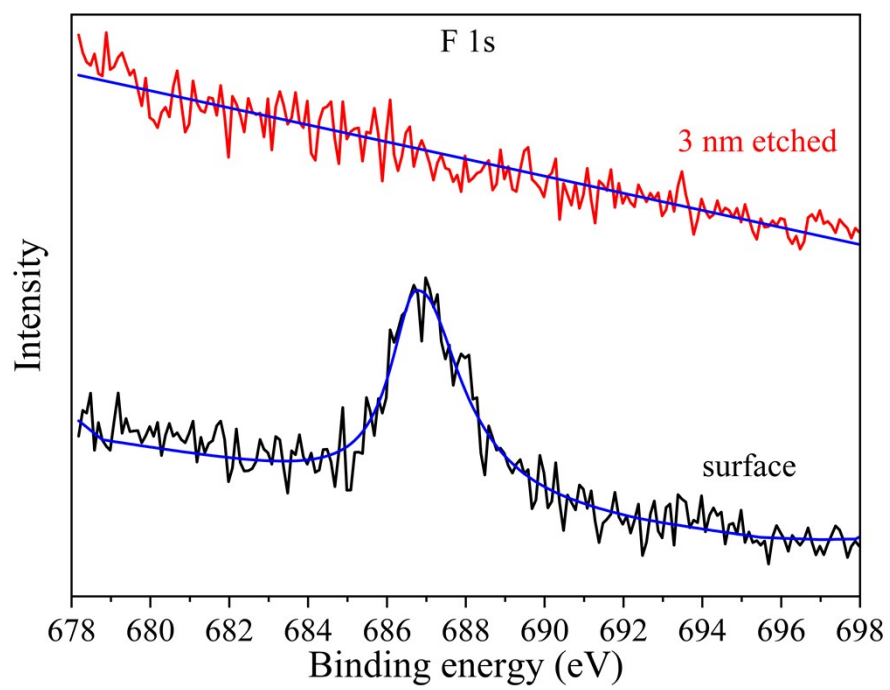

**Fig. S2.** Deep XPS etching of MAPbI<sub>3</sub> films on F 1s after P-F treatment.

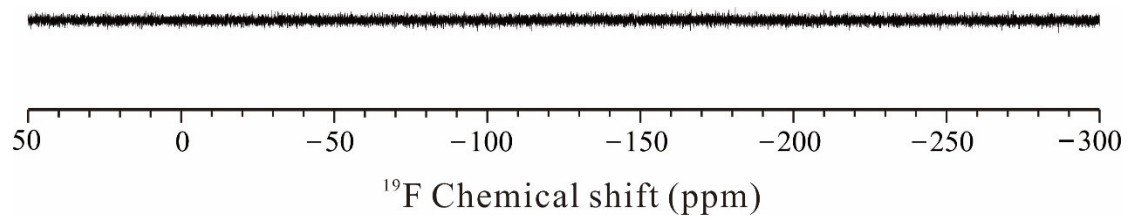

**Fig. S3.** Solid  $^{19}\text{F}$  NMR spectra of pure  $\text{MAPbI}_3$  powders.

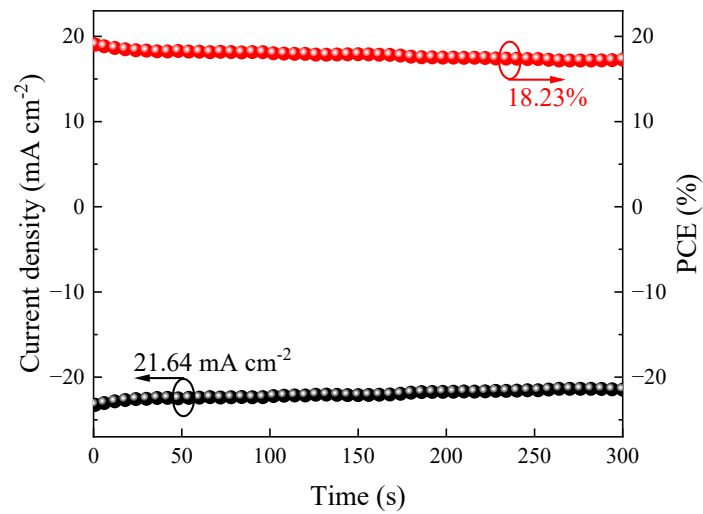

**Fig. S4.** Steady-state photocurrent density and power output at the maximal power point for control PSCs.

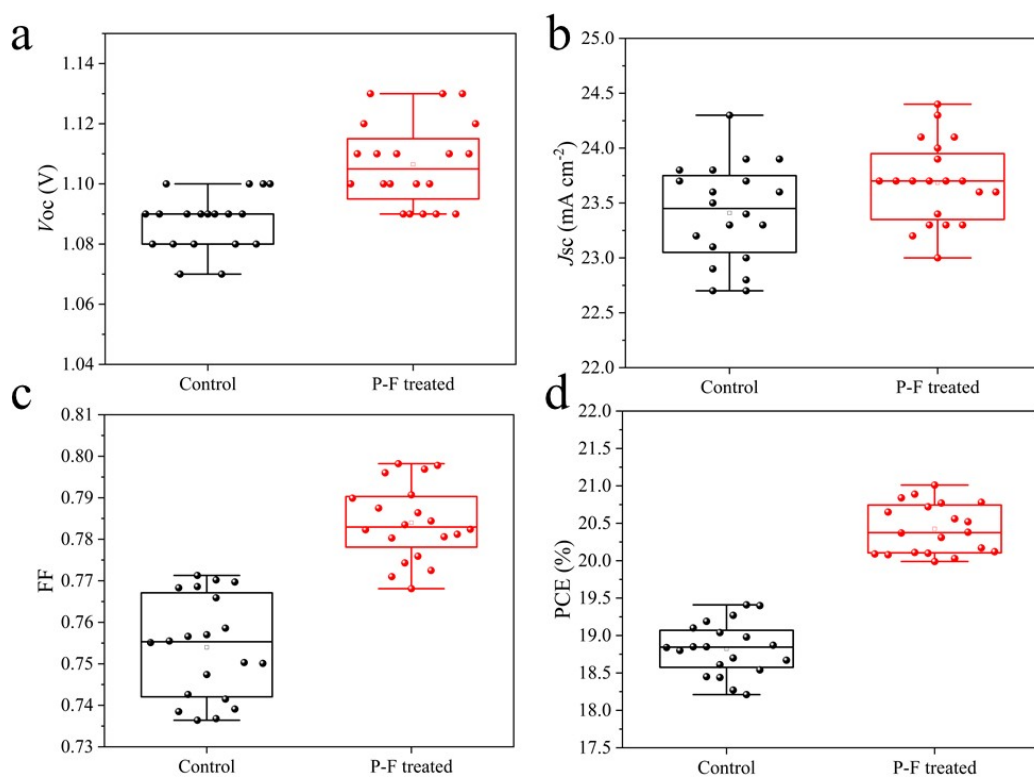

**Fig. S5.** Statistics of the photovoltaic parameters for the control (black) and P-F-PMATFA treated devices (red), showing the difference in  $V_{oc}$  (a),  $J_{sc}$  (b), FF (c), and PCE (d).

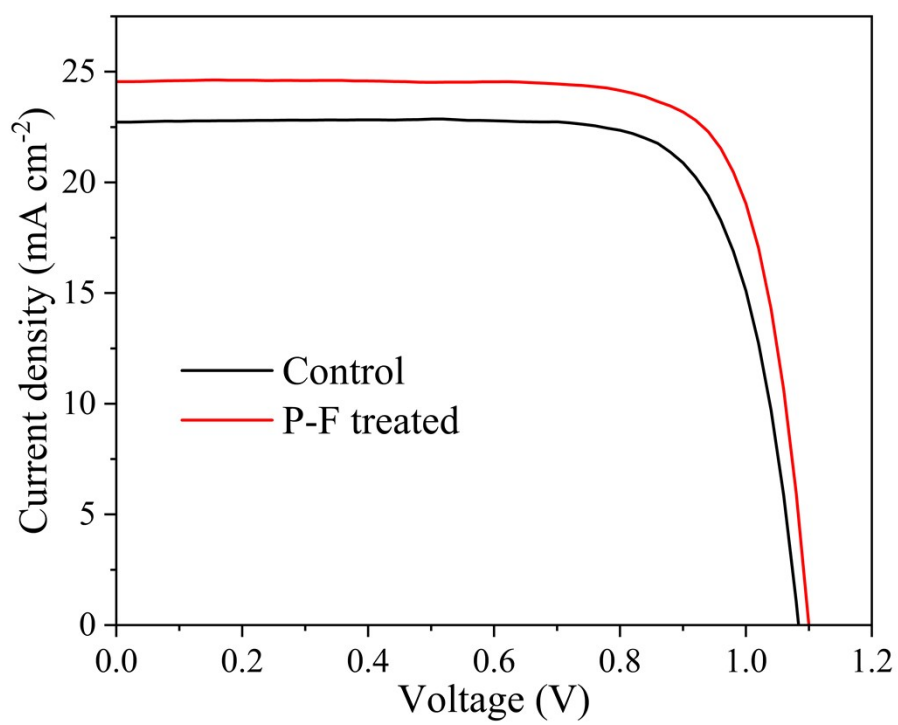

**Fig. S6.** The initial efficiency of unpackaged PSCs stability without P-F and with P-F treated.

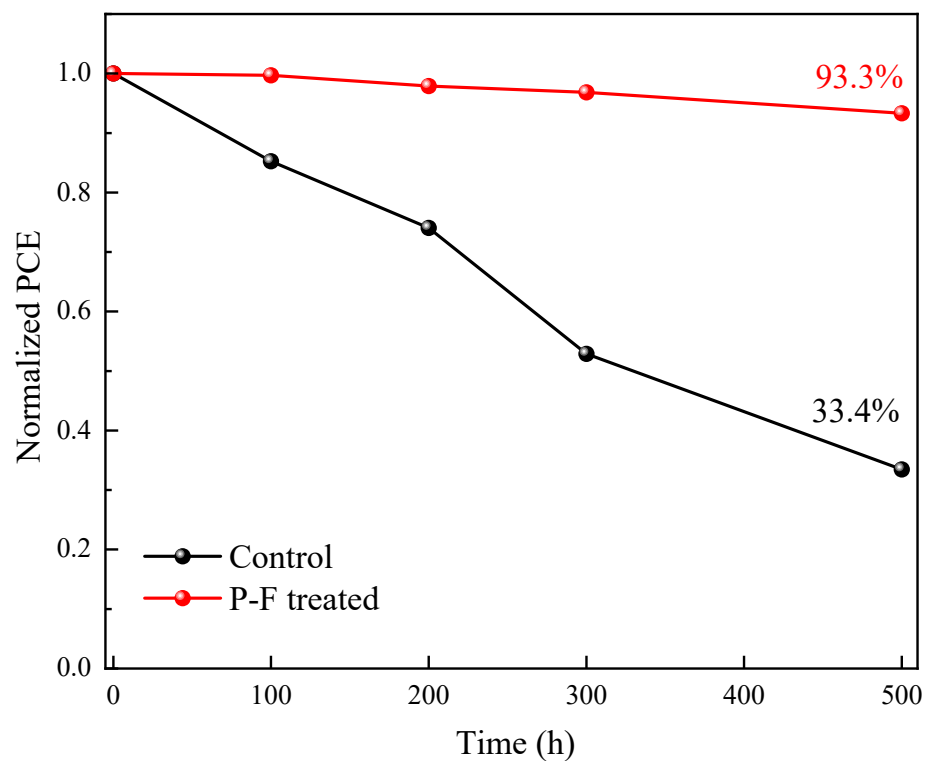

**Fig. S7.** Light stability of unencapsulated devices under continuous 1-sun equivalent illumination in a nitrogen atmosphere.



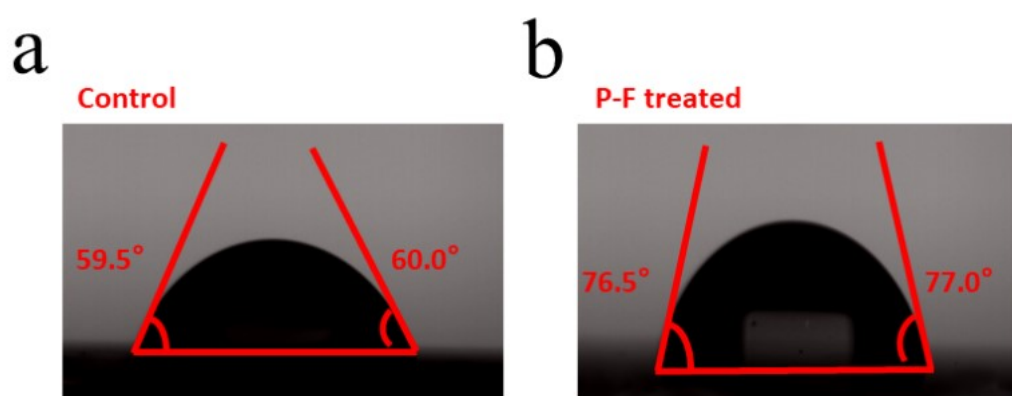

**Fig. S8.** (a,b) The water contact angle of perovskite films treated without and with P-F-PMATFA.

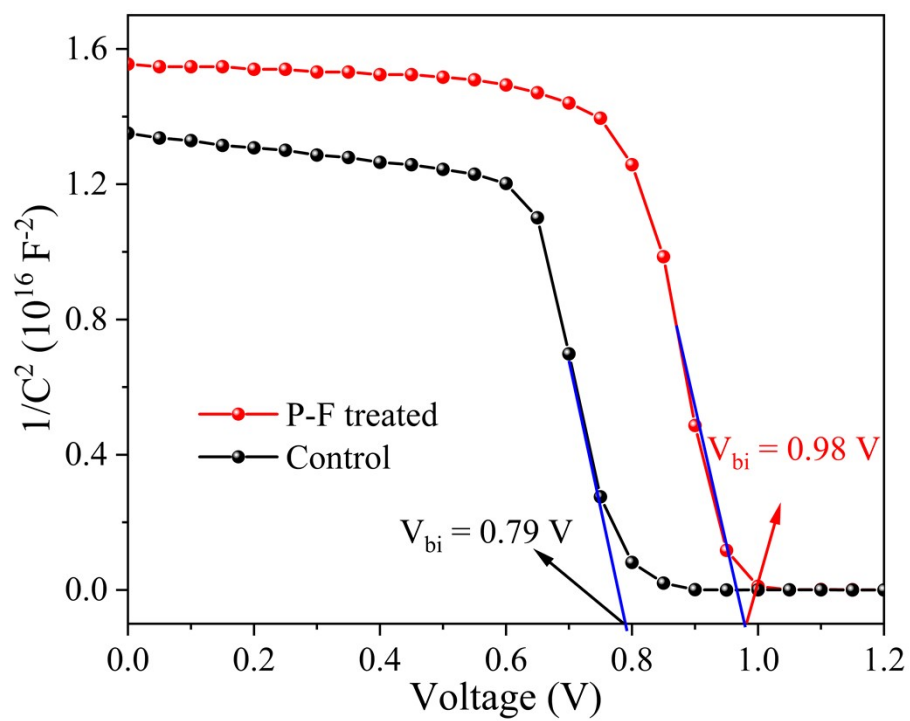

**Fig. S9.** The Mott-Schottky curve of the control and the P-F treated PSCs.

**Table S1.** The fitting results of the equivalent circuit of Nyquist plots.

| Devices     | $R_s$ ( $\Omega$ ) | $R_{rec}$ ( $k\Omega$ ) | $C_{rec}$ (nF) |
|-------------|--------------------|-------------------------|----------------|
| Control     | 37.77              | 0.806                   | 0.503          |
| P-F treated | 42.89              | 2.291                   | 0.620          |
